# Supplementary material for: Role of IL-33 and ST2 signalling pathway in multiple sclerosis: expression by oligodendrocytes and inhibition of myelination in central nervous system
Source: PubMed Central journal article supplement (PMC4960877; doi:10.1186/s40478-016-0344-1), 2016-07-26

# Supplement Figure 1

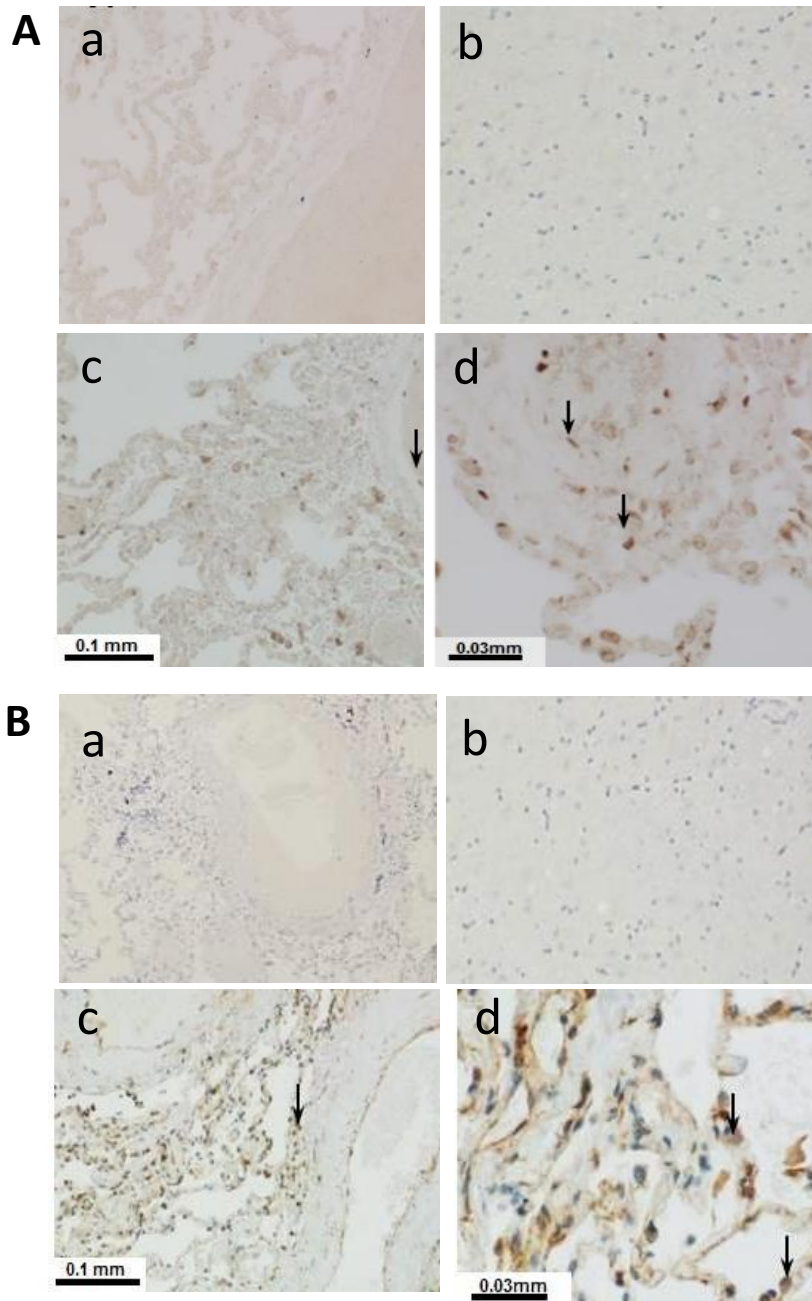

Supplement: 40478_2016_344_MOESM1_ESM.pdf [file 40478_2016_344_MOESM1_ESM.pdf]
